# Supplementary material for: Recent trends in biomedical informatics: a study based on JAMIA articles
Source: PubMed Central journal article supplement — J Am Med Inform Assoc. 2013 Dec;20(e2):e198–205. doi: 10.1136/amiajnl-2013-002429 (PMC3861936; doi:10.1136/amiajnl-2013-002429), 2013-12
Supplement: amiajnl-2013-002429-s1.pdf [file amiajnl-2013-002429-s1.pdf]

## Appendix A.

Because there are essentially three topic assigners (Reviewer 1, Reviewer 2, and the Arbitrator), we calculated a generalized kappa to measure inter-reviewer agreement.

### Fleiss' Generalized Kappa

|                                     |            |
|-------------------------------------|------------|
| <b>Number of Raters:</b>            | 3          |
| <b>Number of Items:</b>             | 564        |
| <b>Number of Rating Categories:</b> | 10         |
| <b><math>p_a</math></b>             | 0.90543735 |

### Overall Rater Agreement

|                         |              |
|-------------------------|--------------|
| <b>kappa</b>            | 0.89155393   |
| <b><math>s^2</math></b> | 0.00003620   |
| <b>z</b>                | 148.18948247 |
| <b>p</b>                | 0.00000000   |
| <b>LCI</b>              | 0.87976196   |
| <b>UCI</b>              | 0.90334590   |

### Inter-reviewer Agreement by Category

|                              |         |                              |         |                              |         |                              |         |                                 |         |
|------------------------------|---------|------------------------------|---------|------------------------------|---------|------------------------------|---------|---------------------------------|---------|
| <b><math>\kappa_1</math></b> | 0.9258  | <b><math>\kappa_2</math></b> | 0.9163  | <b><math>\kappa_3</math></b> | 0.9491  | <b><math>\kappa_4</math></b> | 0.9002  | <b><math>\kappa_5</math></b>    | 0.8347  |
| <b>Var</b>                   | 0.0037  |                              | 0.0036  |                              | 0.0036  |                              | 0.0045  |                                 | 0.0042  |
| <b>SE</b>                    | 0.0605  |                              | 0.0598  |                              | 0.0600  |                              | 0.0671  |                                 | 0.0650  |
| <b>z</b>                     | 15.3141 |                              | 15.3166 |                              | 15.8308 |                              | 13.4100 |                                 | 12.8347 |
| <b>p</b>                     | 0.0000  |                              | 0.0000  |                              | 0.0000  |                              | 0.0000  |                                 | 0.0000  |
| <b>Upper CI</b>              | 1.0442  |                              | 1.0335  |                              | 1.0666  |                              | 1.0318  |                                 | 0.9621  |
| <b>Lower CI</b>              | 0.8073  |                              | 0.7990  |                              | 0.8316  |                              | 0.7687  |                                 | 0.7072  |
| <b><math>\kappa_1</math></b> | 0.7834  | <b><math>\kappa_7</math></b> | 0.8756  | <b><math>\kappa_8</math></b> | 0.9023  | <b><math>\kappa_9</math></b> | 0.7522  | <b><math>\kappa_{10}</math></b> | 0.9085  |
| <b>Var</b>                   | 0.0047  |                              | 0.0039  |                              | 0.0054  |                              | 0.0048  |                                 | 0.0037  |
| <b>SE</b>                    | 0.0685  |                              | 0.0628  |                              | 0.0737  |                              | 0.0693  |                                 | 0.0606  |
| <b>z</b>                     | 11.4280 |                              | 13.9381 |                              | 12.2504 |                              | 10.8596 |                                 | 14.9902 |
| <b>p</b>                     | 0.0000  |                              | 0.0000  |                              | 0.0000  |                              | 0.0000  |                                 | 0.0000  |
| <b>Upper CI</b>              | 0.9177  |                              | 0.9988  |                              | 1.0467  |                              | 0.8879  |                                 | 1.0273  |
| <b>Lower CI</b>              | 0.6490  |                              | 0.7525  |                              | 0.7580  |                              | 0.6164  |                                 | 0.7897  |

We used software available at

<http://www.ccitonline.org/jking/homepage/interrater.html>  
to calculate kappa.

Data are available at <https://idash-data.ucsd.edu/community/27>
